# Supplementary material
Source: publisher site journal article supplement (https://www.spandidos-publications.com/3443/downloadSupplementary)

Figure S1. Immunostaining of mucins on the supported molecular matrix electrophoresis membranes with prolonged exposure time. (A) Image acquired by increasing the exposure time of the film in Fig. 1B using anti-MUC1 antibody (MY. 1E12). (B) Staining with anti-MUC1 antibody (VU4H5). PGM, porcine gastric mucin.

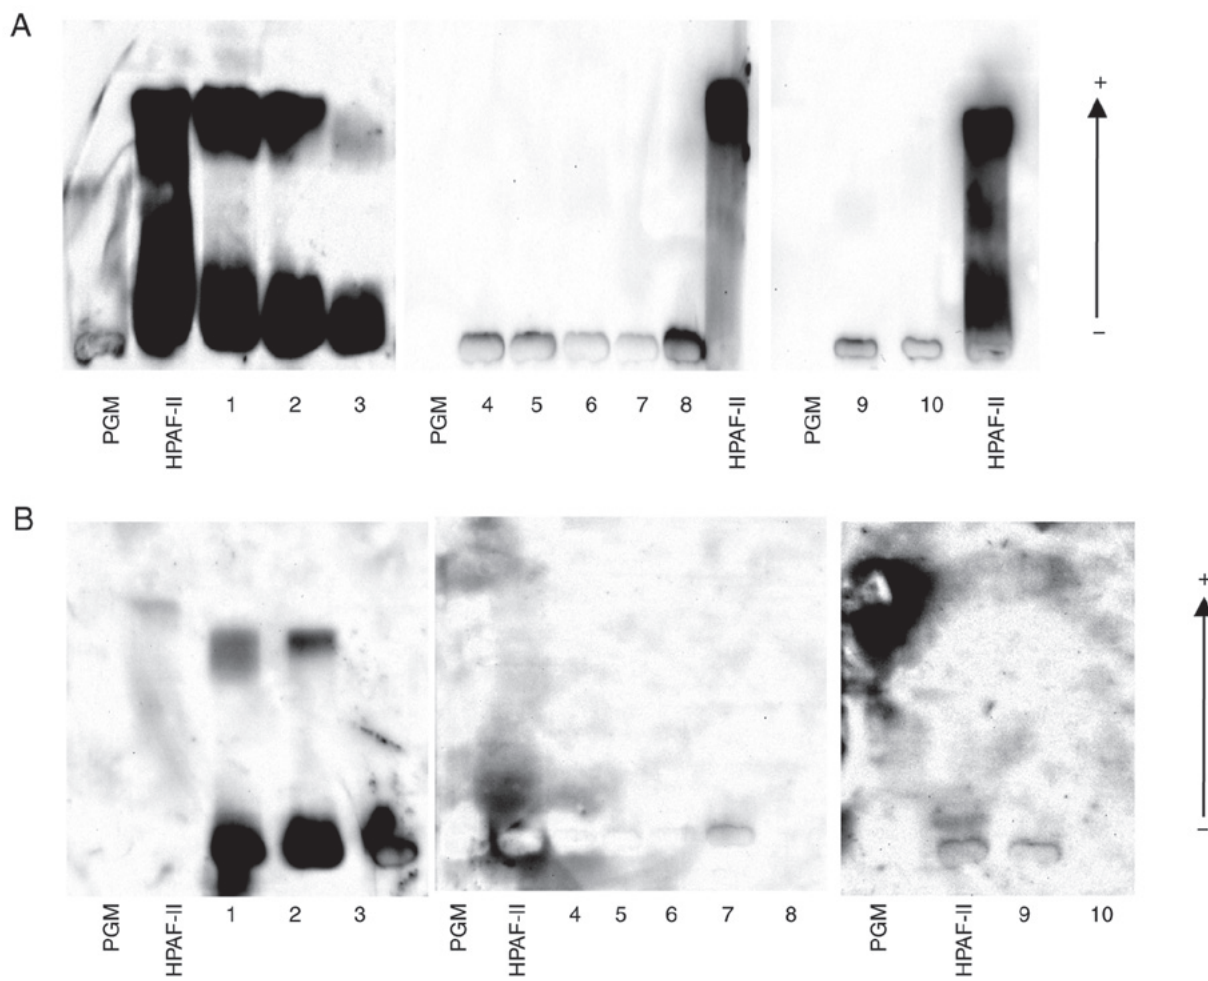

Supplement: Supplementary file 1 [file downloadSupplementary]
